# Supplementary material for: Hybrid materials based on transition metal–BTC–benzimidazole: solvent assisted crystallographic and structural switching
Source: Royal Society of Chemistry journal article supplement (doi:10.1039/c8ce01299g), 2018-01-01
Supplement: c8ce01299g1.pdf [file c8ce01299g1.pdf]

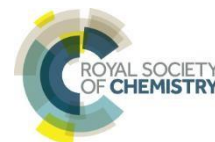

**Journal Name**

ARTICLE

Supporting Information

**Hybrid materials based on transition Metal-BTC-Benzimidazole: Solvent assisted crystallographic and structural switching**

**Ranjay K. Tiwari<sup>a,b</sup>, and J. N. Behera<sup>a,b\*</sup>**

<sup>a</sup> *School of Chemical Sciences, National Institute of Science and Educational Research (NISER), P.O. Jatni, Khurda 752050, Odisha, India.*

<sup>b</sup> *Homi Bhabha National Institute, Mumbai, India*

\*e-mail: jnbehera@niser.ac.in

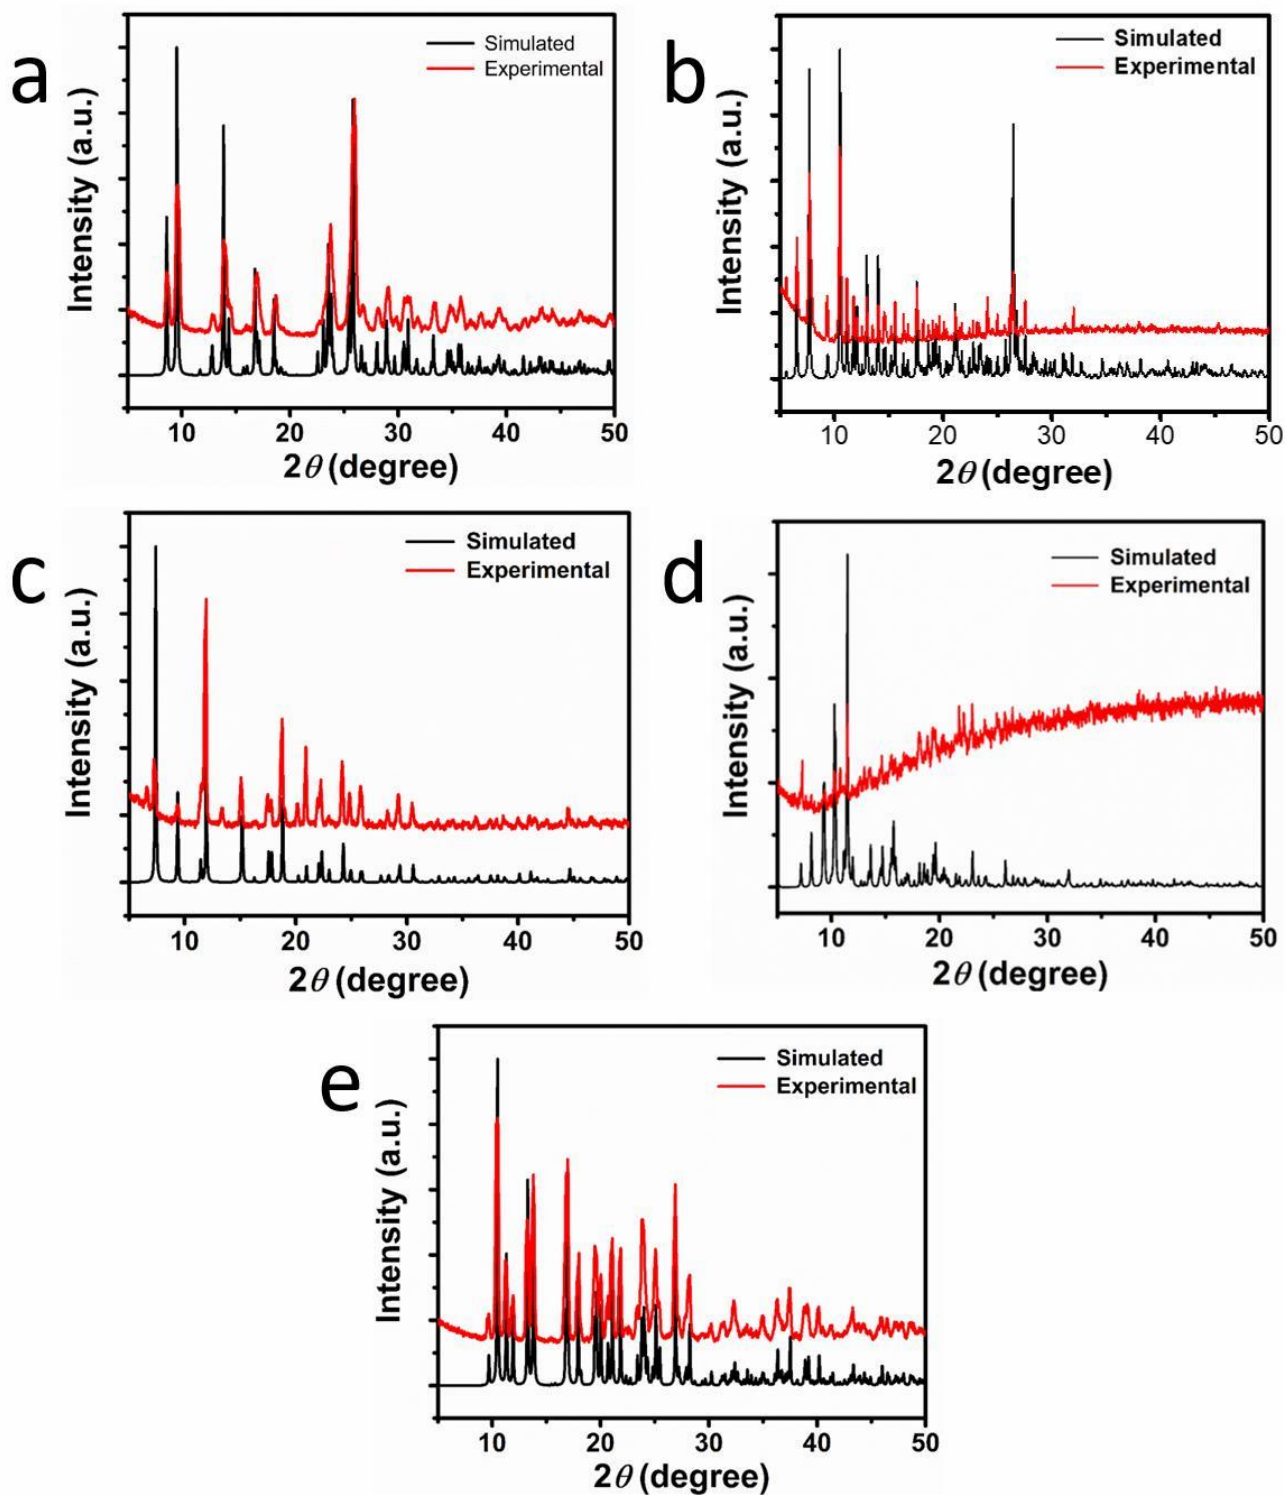

**Figure S1.** PXRD pattern for (a)  $[\text{Zn}_2(\text{H}_2\text{O})_2(\text{HBTC})_2(\text{Blm})_2](\text{H}_2\text{O})_3$ , **1**, (b)  $[\text{2-HABl}]_2[\text{Zn}_2(\text{BTC})_2(\text{2-ABI})(\text{H}_2\text{O})](\text{H}_2\text{O})_5$ , **2**, (c)  $[\text{Cu}_3(\text{BTC})_2(\text{Blm})_6][\text{solvent}]$ , **3**, (d)  $[\text{Co}_4(\text{BTC})_3(\text{Blm})_6][\text{solvent}]$ , **4** and (e)  $[(\text{CH}_3\text{CH}_2)_2\text{NH}_2][\text{Zn}(\text{BTC})(\text{Blm})](\text{H}_2\text{O})$ , **5**.

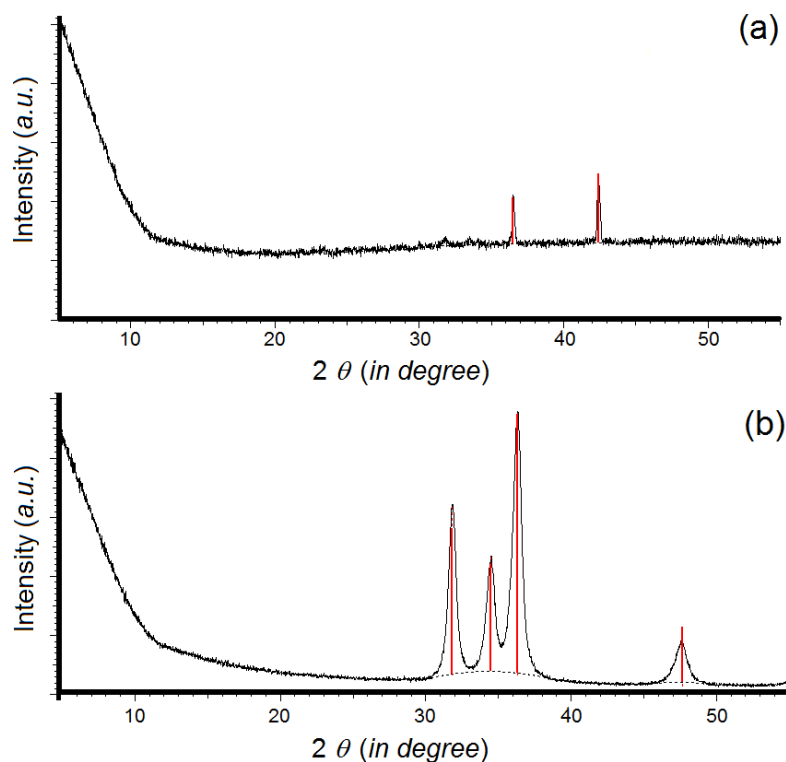

**Figure S2.** Post calcination PXRD analysis of (a)  $[\text{Co}_4(\text{BTC})_3(\text{BIm})_6][\text{solvent}]$ , **4** showing formation of CoO (PDF-00-043-1004) as final product and (b) Post calcination PXRD analysis of  $[\text{Zn}_2(\text{H}_2\text{O})_2(\text{HBTC})_2(\text{BIm})_2](\text{H}_2\text{O})_3$ , **1**,  $[2\text{-HABI}]_2[\text{Zn}_2(\text{BTC})_2(2\text{-ABI})(\text{H}_2\text{O})].(\text{H}_2\text{O})_5$ , **2**,  $[(\text{CH}_3\text{CH}_2)_2\text{NH}_2][\text{Zn}(\text{BTC})(\text{BIm})].(\text{H}_2\text{O})$ , **5**, whereas the ZnO (PDF-01-075-0576) as calcined product.

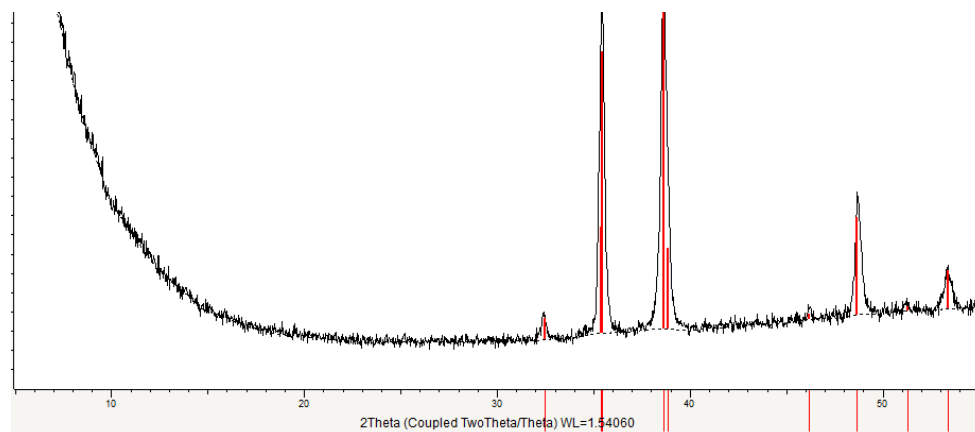

**Figure S3.** Post calcination PXRD analysis of  $[\text{Cu}_3(\text{BTC})_2(\text{BIm})_6][\text{solvent}]$ , **3**, showing formation of CuO (COD-9016326).

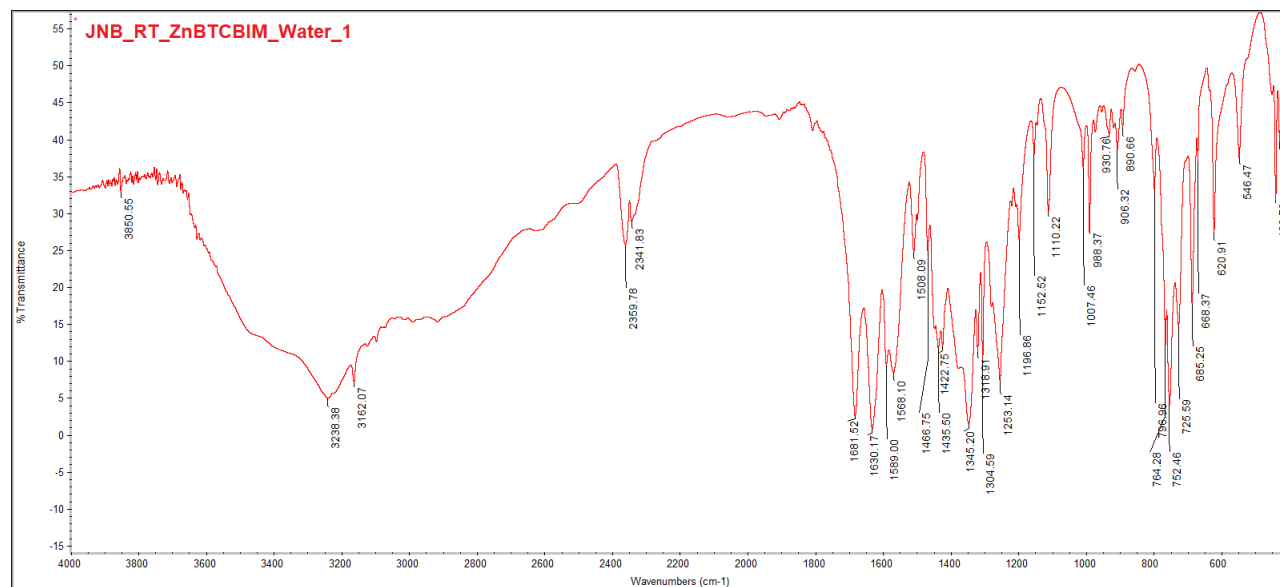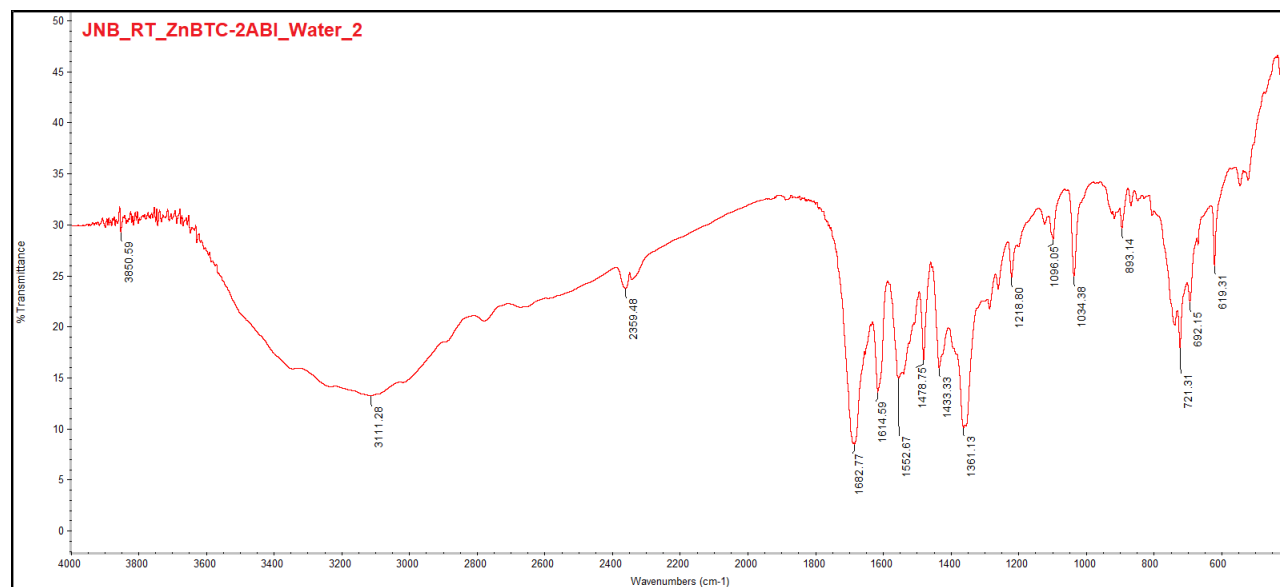

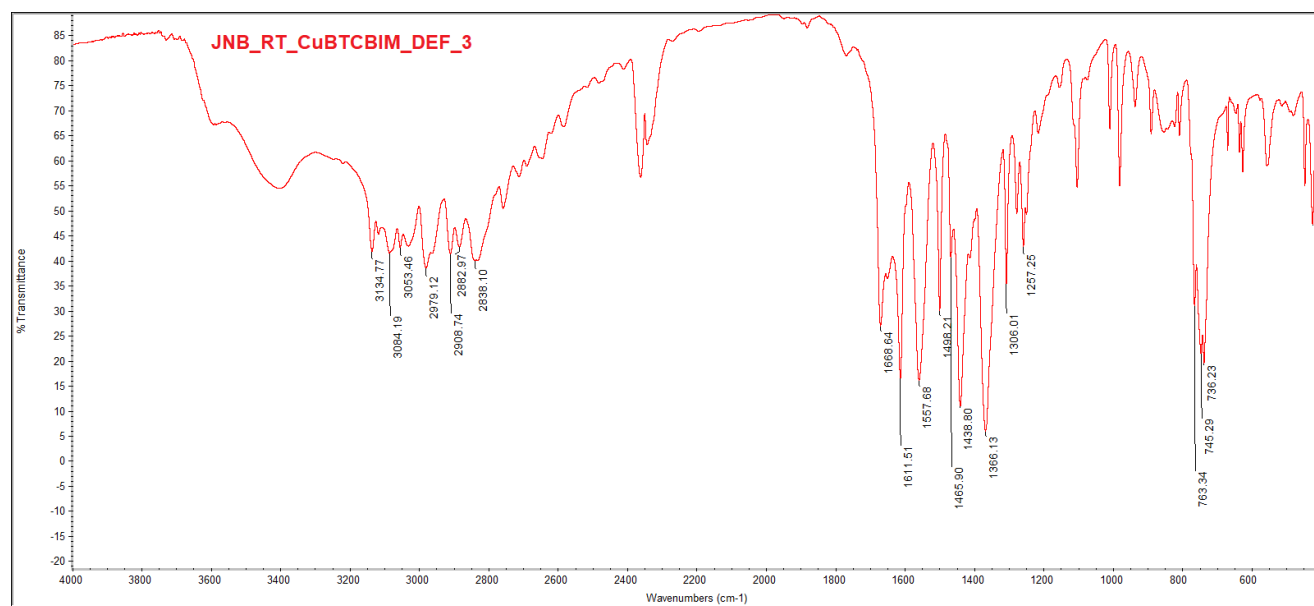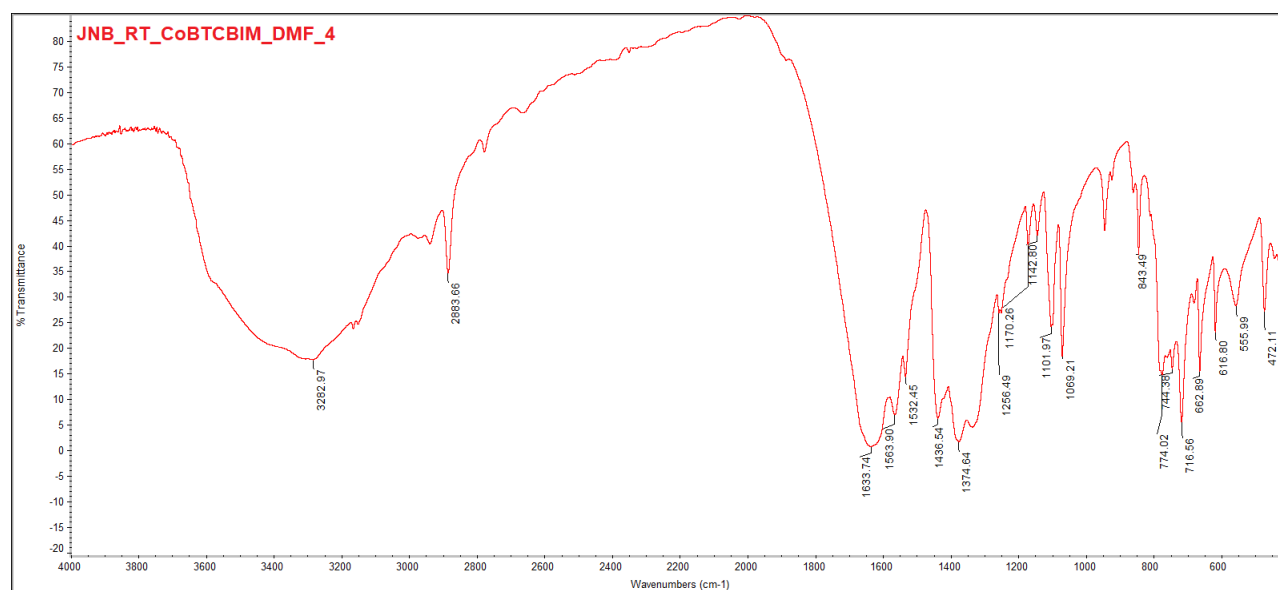

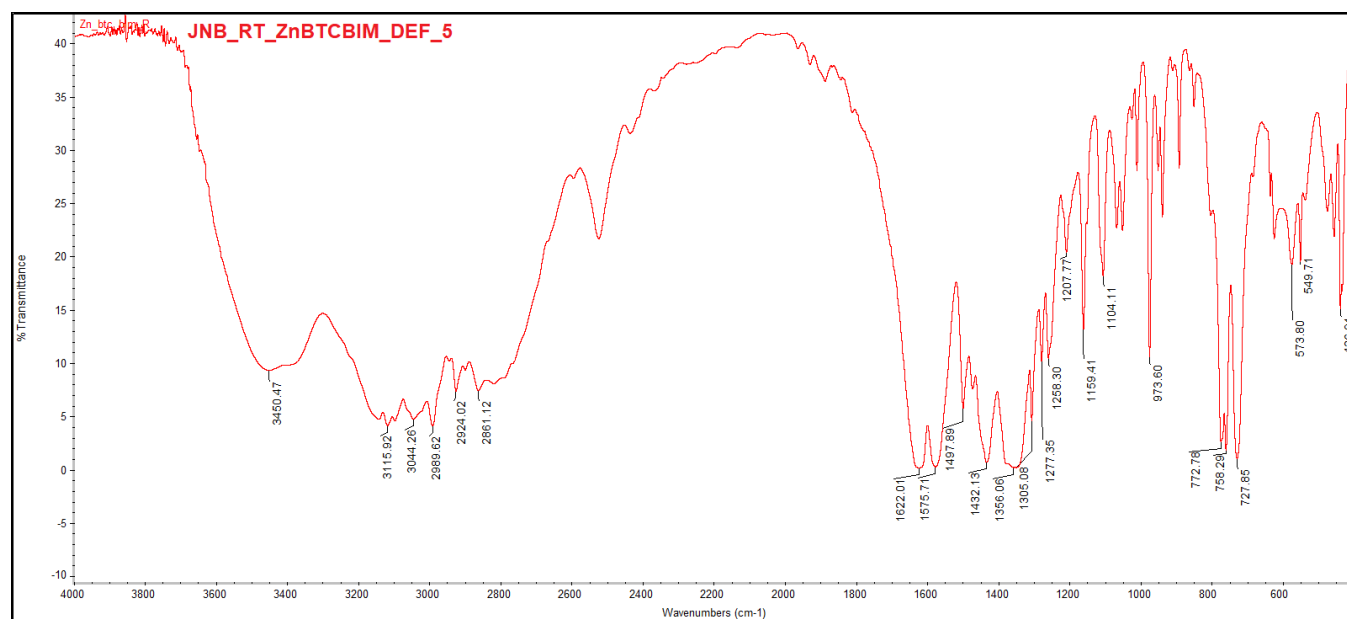

**Figure S4.** FTIR Spectra diagram of 1-5.

**Table S1.** Selected bond length tables of **1-5**

|                                                                                                                                     |            |                     |            |                     |            |
|-------------------------------------------------------------------------------------------------------------------------------------|------------|---------------------|------------|---------------------|------------|
| [Zn <sub>2</sub> (H <sub>2</sub> O) <sub>2</sub> (HBTC) <sub>2</sub> (BIm) <sub>2</sub> ](H <sub>2</sub> O) <sub>3</sub> , <b>1</b> |            |                     |            |                     |            |
| Zn1-O1                                                                                                                              | 1.9581(9)  | Zn1-O4 <sup>a</sup> | 1.9722(8)  | Zn1-O1W             | 2.0313(10) |
| Zn1-N1                                                                                                                              | 1.9693(10) |                     |            |                     |            |
| [2-HABI] <sub>2</sub> [Zn <sub>2</sub> (BTC) <sub>2</sub> (2-ABI)(H <sub>2</sub> O)].(H <sub>2</sub> O) <sub>5</sub> , <b>2</b>     |            |                     |            |                     |            |
| Zn1-O1                                                                                                                              | 1.9506(18) | Zn1-O6 <sup>b</sup> | 1.9675(19) | Zn1-O7              | 1.9770(17) |
| Zn1-N1                                                                                                                              | 1.975(2)   | Zn2 – O3            | 1.9766(18) | Zn2-O9 <sup>c</sup> | 1.9845(18) |
| Zn2-O12 <sup>d</sup>                                                                                                                | 2.0195(18) | Zn2-O1W             | 2.023(2)   |                     |            |
| [Cu <sub>3</sub> (BTC) <sub>2</sub> (BIm) <sub>6</sub> ][solvent], <b>3</b>                                                         |            |                     |            |                     |            |
| Cu1-O1 <sup>e</sup>                                                                                                                 | 1.9702(9)  | Cu1-O1              | 1.9702(9)  | Cu1-N1              | 1.9851(14) |
| Cu1-N1 <sup>e</sup>                                                                                                                 | 1.9851(14) |                     |            |                     |            |
| [Co <sub>4</sub> (BTC) <sub>3</sub> (BIm) <sub>6</sub> ][solvent], <b>4</b>                                                         |            |                     |            |                     |            |
| Co1-Co1 <sup>f</sup>                                                                                                                | 2.8713(8)  | Co1-O3              | 2.024(2)   | Co1-O4 <sup>f</sup> | 2.058(2)   |
| Co1-O7                                                                                                                              | 2.048(2)   | Co1-O8 <sup>f</sup> | 2.039(2)   | Co1-N5              | 2.025(3)   |
| Co2-O1                                                                                                                              | 1.971(2)   | Co2-O5 <sup>g</sup> | 2.405(3)   | Co2-O6 <sup>g</sup> | 2.019(2)   |
| Co2-N1                                                                                                                              | 2.037(3)   | Co2-N3              | 2.014(3)   |                     |            |
| [(CH <sub>3</sub> CH <sub>2</sub> ) <sub>2</sub> NH <sub>2</sub> ][Zn(BTC)(BIm)].(H <sub>2</sub> O), <b>5</b>                       |            |                     |            |                     |            |
| Zn1-O1                                                                                                                              | 1.951(2)   | Zn1-O3 <sup>h</sup> | 1.980(2)   | Zn1-O6 <sup>i</sup> | 1.986(2)   |
| Zn1-N1                                                                                                                              | 2.027(3)   |                     |            |                     |            |

Symmetry transformations used to generate equivalent atoms:

a)  $x+1/2, -y+3/2, z+1/2$ , b)  $-x+1, -y+1, -z+1$  c)  $x, y, z-1$  d)  $x-1, y, z-1$  e)  $1-x, 1-y, 1-z$ ; f)  $-x+1, -y+1, -z+1$  g)  $-x+1/2, y-1/2, -z+1/2$  h)  $x-1/2, -y+1/2, z$  i)  $-x+1, -y+1, z-1/2$ .

**Table S2.** Classical Hydrogen bonding table for complexes **1-5**.<sup>#</sup>

| D—H···A                                                                                                                      |                     | D—H     | H···A   | D—A        | ∠D—H···A |
|------------------------------------------------------------------------------------------------------------------------------|---------------------|---------|---------|------------|----------|
| <b>[Zn<sub>2</sub>(H<sub>2</sub>O)<sub>2</sub>(HBTC)<sub>2</sub>(BIm)<sub>2</sub>](H<sub>2</sub>O)<sub>3</sub>, <b>1</b></b> |                     |         |         |            |          |
| O6—H6A···O3W                                                                                                                 | 1/2+x,-1/2+y,z      | 0.82    | 1.80(2) | 2.6057(17) | 170      |
| N2—H2···O5                                                                                                                   | -1/2+x,1/2-y,-1/2+z | 0.86    | 2.03    | 2.8233(14) | 152      |
| O1W—H1W1···O4                                                                                                                | 1-x,y,1/2-z         | 0.82(3) | 1.93(2) | 2.7254(13) | 163      |
| O1W—H2W1···O2                                                                                                                | 1/2-x,3/2-y,-z      | 0.81(3) | 1.85(3) | 2.6459(15) | 169      |
| O2W—H1W2···O3                                                                                                                | -1/2+x,-1/2+y,z     | 0.84(2) | 1.98(3) | 2.8064(13) | 170      |
| O3W—H1W3···O2                                                                                                                | 1/2-x,3/2-y,-z      | 0.78(2) | 2.16(2) | 2.8517(18) | 148      |
| O3W—H2W3···O2W                                                                                                               |                     | 0.77(3) | 2.15(2) | 2.8876(16) | 163      |
| <b>[2-HABI]<sub>2</sub>[Zn<sub>2</sub>(BTC)<sub>2</sub>(2-ABI)(H<sub>2</sub>O)].(H<sub>2</sub>O)<sub>5</sub>, <b>2</b></b>   |                     |         |         |            |          |
| O1W—H1WA···O4W                                                                                                               | x,y,-1+z            | 0.88    | 2.05    | 2.669(8)   | 127      |
| N2—H2···O5W                                                                                                                  | -1+x,y,z            | 0.86    | 1.91    | 2.749(5)   | 163      |
| O1W—H1WB···O12                                                                                                               | -x,-y,1-z           | 0.88    | 1.87    | 2.734(3)   | 168      |
| O6W—H6WA                                                                                                                     |                     | 0.85    |         |            |          |
| N3—H3A···O7                                                                                                                  |                     | 0.86    | 2.12    | 2.893(4)   | 149      |
| N3—H3B···O4W                                                                                                                 | -1+x,y,z            | 0.86    | 2.10    | 2.934(7)   | 163      |
| O6W—H6WB                                                                                                                     |                     | 0.85    |         |            |          |
| N4—H4A···O2                                                                                                                  | 1+x,y,z             | 0.86    | 1.84    | 2.683(4)   | 167      |
| N5—H5···O3                                                                                                                   | 1-x,-y,1-z          | 0.86    | 2.14    | 2.915(3)   | 149      |
| N5—H5···O10                                                                                                                  | 1-x,-y,-z           | 0.86    | 2.14    | 2.915(3)   | 149      |
| O5W—H5WA                                                                                                                     |                     | 0.85    |         |            |          |



|                                                                                                     |                       |      |      |           |     |
|-----------------------------------------------------------------------------------------------------|-----------------------|------|------|-----------|-----|
| O5W—H5WB···O1                                                                                       | $x, y, -1+z$          | 0.85 | 2.02 | 2.858(4)  | 167 |
| O5W—H5WB···O6                                                                                       | $1-x, 1-y, 1-z$       | 0.85 | 2.58 | 3.056(4)  | 116 |
| N6—H6A···O10                                                                                        | $1-x, -y, 1-z$        | 0.86 | 1.99 | 2.760(3)  | 148 |
| N6—H6B···O6W                                                                                        | $1+x, y, z$           | 0.86 | 2.09 | 2.875(6)  | 153 |
| N7—H7···O4                                                                                          | $2-x, 1-y, 1-z$       | 0.86 | 1.93 | 2.774(4)  | 167 |
| O2W—H2WA···O3W                                                                                      | $x, y, -1+z$          | 0.85 | 1.95 | 2.757(10) | 159 |
| N8—H8···O5                                                                                          | $x, y, -1+z$          | 0.86 | 2.02 | 2.766(4)  | 144 |
| O2W—H2WB···O9                                                                                       | $x, y, -1+z$          | 0.85 | 2.15 | 2.983(5)  | 167 |
| O4W—H4WA···O8                                                                                       | $x, y, -1+z$          | 0.85 | 2.32 | 2.701(6)  | 107 |
| N9—H9A···O5                                                                                         | $x, y, -1+z$          | 0.86 | 2.39 | 3.067(4)  | 136 |
| N9—H9B···O2W                                                                                        | $2-x, 1-y, -z$        | 0.86 | 1.99 | 2.850(6)  | 176 |
| O4W—H4WB···O8                                                                                       | $x, y, -1+z$          | 0.85 | 2.31 | 2.701(6)  | 108 |
| O3W—H3WA···O5                                                                                       | $1-x, 1-y, 1-z$       | 0.85 | 2.47 | 3.316(9)  | 177 |
| O3W—H3WB                                                                                            |                       | 0.85 |      |           |     |
| <b>[Cu<sub>3</sub>(BTC)<sub>2</sub>(BIm)<sub>6</sub>][solvent], 3</b>                               |                       |      |      |           |     |
| N2—H2···O2                                                                                          | $y, -x+y, -z$         | 0.86 | 1.88 | 2.729(5)  | 170 |
| <b>[Co<sub>4</sub>(BTC)<sub>3</sub>(BIm)<sub>6</sub>][solvent], 4</b>                               |                       |      |      |           |     |
| N2—H2A···O9                                                                                         | $1/2+x, 1/2-y, 1/2+z$ | 0.86 | 1.93 | 2.762(5)  | 161 |
| N4—H4A···O2                                                                                         | $1/2-x, -1/2-y, -z$   | 0.86 | 1.83 | 2.687(5)  | 175 |
| N6—H6A···O9                                                                                         | $x, -1+y, z$          | 0.86 | 2.04 | 2.851(5)  | 158 |
| <b>[(CH<sub>3</sub>CH<sub>2</sub>)<sub>2</sub>NH<sub>2</sub>][Zn(BTC)(BIm)].(H<sub>2</sub>O), 5</b> |                       |      |      |           |     |
| N1A—H1···O2                                                                                         | $1/2+x, 1/2-y, z$     | 0.89 | 1.84 | 2.726(7)  | 170 |

| ARTICLE      |                        |      |      |          |     | JournalName |
|--------------|------------------------|------|------|----------|-----|-------------|
| N1A—H2···O1W | $1/2-x, 1/2+y, 1/2+z$  | 0.89 | 1.90 | 2.785(9) | 171 |             |
| N2—H2A···O4  | $1/2-x, 1/2+y, -1/2+z$ | 0.86 | 1.89 | 2.700(4) | 157 |             |
| O1W—H1W···O3 |                        | 0.87 | 2.10 | 2.904(6) | 155 |             |
| O1W—H2W···O5 | $-x, -y, -1/2+z$       | 0.87 | 1.90 | 2.754(6) | 168 |             |

#Where 'D' is a donor and 'A' is acceptor, the bond lengths are in (Å) and angles are in (°).
